# Supplementary material for: Interleukin-6: A Potential Biomarker for Dysmenorrhea and Disease Severity in Adenomyosis
Source: Research Square preprint supplement (doi:10.21203/rs.3.rs-7472436/v1), 2025-10-21
Supplement: Supplementary file 1 [file 44c0080623bda11d94d26a2d.docx]

Table S1 Efficiency of serum interleukin-6 for dysmenorrhea in adenomyosis.

| Variable | Area under the cures | Sensitivity (%) | Specificity (%) | Cutoff | P | 95%CI |
| --- | --- | --- | --- | --- | --- | --- |
| Total cohort | 0.683 | 71.3 | 47.1 | 3.02 | 0.000 | 0.597-0.767 |
| Diffuse adenomyosis | 0.640 | 65.2 | 59.0 | 3.12 | 0.012 | 0.535-0.744 |
| Focus adenomyosis | 0.788 | 63.3 | 91.7 | 3.24 | 0.004 | 0.649-0.926 |
